# Supplementary material for: Evaluation of Peer-to-Peer Support and Health Care Utilization Among Community-Dwelling Older Adults
Source: PubMed Central journal article supplement (PMC7739125; doi:10.1001/jamanetworkopen.2020.30090), 2020-12-15
Supplement: jamanetwopen-e2030090-s001.pdf [file jamanetwopen-e2030090-s001.pdf]

## Supplemental Online Content

Jacobs EA, Schwei R, Hetzel S, et al. Evaluation of peer-to-peer support and health care utilization among community-dwelling older adults. *JAMA Netw Open*. 2020;3(12):e2030090. doi:10.1001/jamanetworkopen.2020.30090

**eTable.** Variables Included in the Propensity Score

This supplemental material has been provided by the authors to give readers additional information about their work.

eTable. Variables Included in the Propensity Score

| Category                       | Variable Description                                                  | Variable Format          |
|--------------------------------|-----------------------------------------------------------------------|--------------------------|
| Demographic                    | Age                                                                   | Continuous               |
|                                | Do you live alone?                                                    | Dichotomous              |
|                                | Do you receive in home care from someone other than your spouse?      | Dichotomous              |
|                                | Have you previously been in a nursing home?                           | Dichotomous              |
|                                | How many times have you seen a doctor in the last 6 months?           | Continuous               |
|                                | I drive myself to get around                                          | Dichotomous              |
|                                | A family member drives me to get around                               | Dichotomous              |
|                                | A friend or helper drives me to get around                            | Dichotomous              |
|                                | I use other ways to get around                                        | Dichotomous              |
|                                | Have you driven in the last 3 months                                  | Dichotomous              |
|                                | Did anyone in your immediate family drive a car in the last 3 months? | Dichotomous              |
|                                | Total number of medical conditions (0 - 6)                            | Continuous               |
|                                | General Self Efficacy questionnaire total score                       | Continuous               |
|                                | Loneliness questionnaire total score                                  | Continuous               |
|                                | CESD depression symptoms questionnaire total score                    | Continuous               |
|                                | Anxious classification based on Geriatric Anxiety Index total > 2     | Dichotomous              |
|                                | How often do you get out of your house?                               | 5 response ordinal scale |
|                                | How often are you able to go where you would like to go?              | 3 response ordinal scale |
|                                | Is getting where you need to go usually a problem?                    | 3 response ordinal scale |
| Health condition               | Have you ever stayed in bed most of the time over the last 2 weeks?   | Dichotomous              |
|                                | RAPA - Aerobic physicality status                                     | 5 response ordinal scale |
|                                | RAPA - Strength status                                                | 3 response ordinal scale |
|                                | ADL - Disability status                                               | 3 response ordinal scale |
|                                | IADL - Disability total score                                         | Continuous               |
|                                | Rosow-Breslow - physical ability total score                          | Continuous               |
|                                | NAGI - total score about physical ability                             | Continuous               |
|                                | SF-12 - Mental composite score                                        | Continuous               |
|                                | SF-12 - Physical composite score                                      | Continuous               |
|                                | Brief Resilience Scale total                                          | Continuous               |
| Overall health screening score | Continuous                                                            |                          |
